# Supplementary material for: Application of Reflectance Ratios on High-Resolution Satellite Imagery to Remotely Identify Eucalypt Vegetation
Source: Preprints.org preprint supplement (doi:10.20944/preprints202011.0574.v1), 2020-11-23
Supplement: Supplementary file 2 [file supplementary]

**Site and Vegetation Management Regional Ecosystem (VMRE) Map Community Descriptions**

*Large All-Eucalypt Site*

**Figure S1. All-eucalypt site from the 2017 VMRE map colored by vegetation type where green represents areas dominated by eucalypt vegetation.**

**Table S1. Description of all-eucalypt site vegetation communities from the 2017 VMRE map.**

| Regional Ecosystem ID | Percent REID | Vegetation Management Class | Dominant Vegetation Community Description | Structure category | Area (km2) |
| --- | --- | --- | --- | --- | --- |
| 11.10.1 | 100 | No concern at present | *Corymbia* *citriodora* woodland on coarse-grained sedimentary rocks | Sparse | 1.75 |
| 11.10.1/11.8.4 | 60/40 | No concern at present | *Corymbia* *citriodora* woodland on coarse-grained sedimentary rocks | Sparse | 5.58 |
| 11.10.1/11.9.2 | 80/20 | No concern at present | *Corymbia* *citriodora* woodland on coarse-grained sedimentary rocks | Sparse | 0.04 |
| 11.8.1 | 100 | No concern at present | *Eucalyptus* *laevopinea* tall open forest on Cainozoic igneous rocks. Elevated plateaus | Mid-dense | 0.74 |
| 11.8.1/11.8.2 | 90/10 | No concern at present | *Eucalyptus* *laevopinea* tall open forest on Cainozoic igneous rocks. Elevated plateaus | Mid-dense | 60.38 |
| 11.8.1/11.8.4 | 60/40 | No concern at present | *Eucalyptus* *laevopinea* tall open forest on Cainozoic igneous rocks. Elevated plateaus | Mid-dense | 6.60 |
| 11.8.2 | 100 | No concern at present | *Eucalyptus* *tereticornis*, E. *melliodora* woodland on Cainozoic igneous rocks | Sparse | 16.24 |
| 11.8.2/11.10.1/11.8.4 | 50/40/10 | No concern at present | *Eucalyptus* *tereticornis*, E. *melliodora* woodland on Cainozoic igneous rocks | Sparse | 1.31 |
| 11.8.2/11.8.4 | 60/40 | No concern at present | *Eucalyptus* *tereticornis*, E. *melliodora* woodland on Cainozoic igneous rocks | Sparse | 4.04 |
| 11.8.4 | 100 | No concern at present | *Eucalyptus* melanophloia open woodland on Cainozoic igneous rocks. | Very sparse | 1.51 |
| 11.8.4/11.10.1 | 70/30 | No concern at present | *Eucalyptus* melanophloia open woodland on Cainozoic igneous rocks. | Very sparse | 2.54 |
| 11.8.4/11.8.2 | 70/30 | No concern at present | *Eucalyptus* melanophloia open woodland on Cainozoic igneous rocks. | Very sparse | 4.67 |

*All-Eucalypt Mid-dense Site*

**Figure S2. All-eucalypt mid-dense site from the 2017 VMRE map colored by vegetation type where green represents areas dominated by eucalypt vegetation.**

**Table S2. Description of all-eucalypt mid-dense site vegetation communities from the 2017 VMRE map.**

| Regional Ecosystem ID | Percent  REID | Vegetation Management Class | Dominant Vegetation Community Description | Structure category | Area (km2) |
| --- | --- | --- | --- | --- | --- |
| 11.10.13a | 100 | Least concern | *Eucalyptus* spp. and/or *Corymbia* spp. open forest on scarps and sandstone tablelands | Mid-dense | 7.61 |
| 11.10.5 | 100 | Least concern | *Eucalyptus* *sphaerocarpa* +/- E. *mensalis*, E. *saligna*, tall open forest on coarse-grained sedimentary rocks. Tablelands | Mid-dense | 62.90 |

*Mixed Eucalypt Site*

**Figure S3. Mixed eucalypt site from the 2017 VMRE map colored by vegetation type where green represents areas dominated by eucalypt vegetation, blue represents areas dominated by non-eucalypt vegetation, and grey represents non-remnant areas (cleared land).**

**Table S3. Description of mixed eucalypt site vegetation communities from the 2017 VMRE map.**

| Regional Ecosystem ID | Percent REID | Vegetation Management Class | Dominant Vegetation Community Description | Structure category | | Area (km2) |
| --- | --- | --- | --- | --- | --- | --- |
| 8.12.12a | 100 | Least concern | *Eucalyptus* *tereticornis* and/or *Corymbia* spp. and/or E. platyphylla and/or *Lophostemon* *suaveolens* woodland to open forest on hill slopes on Mesozoic to Proterozoic igneous rocks | | Sparse | 6.08 |
| 8.12.2/8.12.3a/8.12.19 | 40/30/30 | Least concern | Evergreen notophyll to complex notophyll vine forest of uplands, highlands and foothills, on Mesozoic to Proterozoic igneous rocks | | Dense | 56.40 |
| 8.12.31a | 100 | Least concern | *Eucalyptus* resinifera and/or E. *portuensis* and/or *E. acmenoides* and/or *Allocasuarina* spp. open forest on moist upper slopes of ranges on Mesozoic to Proterozoic igneous rocks | | Mid-dense | 7.86 |
| 8.12.31a/8.12.2 | 60/40 | Least concern | *Eucalyptus* resinifera and/or E. *portuensis* and/or E. acmenoides and/or *Allocasuarina* spp. open forest on moist upper slopes of ranges on Mesozoic to Proterozoic igneous rocks | | Mid-dense | 1.11 |
| 8.12.32/8.12.7c/8.12.5a | 50/30/20 | Least concern | *Corymbia* *intermedia* +/- *E.* *portuensis* +/- *E. exserta* open forest to woodland with areas of *Allocasuarina* spp. +/- *Banksia integrifolia* open forest on high ranges, on Mesozoic to Proterozoic igneous rocks | | Mid-dense | 0.39 |
| 8.12.3a | 100 | Least concern | Evergreen to semi-evergreen, notophyll to microphyll, vine forest to vine thicket, of foothills and uplands on Mesozoic to Proterozoic igneous rocks | | Dense | 0.70 |
| 8.12.2/8.12.3a/8.12.19 | 40/30/30 | Least concern | Evergreen notophyll to complex notophyll vine forest of uplands, highlands and foothills, on Mesozoic to Proterozoic igneous rocks | | Dense | 5.19 |
| 8.12.3b | 100 | Least concern | Evergreen to semi-evergreen, notophyll to microphyll, vine forest to vine thicket, of foothills and uplands on Mesozoic to Proterozoic igneous rocks | | Dense | 0.15 |
| 8.3.1a | 100 | Of concern | Semi-deciduous to evergreen notophyll to mesophyll vine forest, +/- sclerophyll emergents, fringing or in the vicinity of watercourses | | Dense | 0.02 |
| 8.3.3a | 100 | Least concern | *Melaleuca leucadendra* and/or *M. fluviatilis* and/or *Casuarina cunninghamiana* +/- *Syncarpia glomulifera* open forest, on creek banks | | Mid-dense | 0.01 |
| 8.3.3a/8.3.1a | 80/20 | Least concern | *Melaleuca leucadendra* and/or *M. fluviatilis* and/or *Casuarina cunninghamiana* +/- *Syncarpia glomulifera* open forest, on creek banks | | Mid-dense | 0.36 |
| 8.3.3a/8.3.5 | 60/40 | Least concern | *Melaleuca leucadendra* and/or *M. fluviatilis* and/or *Casuarina cunninghamiana* +/- *Syncarpia glomulifera* open forest, on creek banks | | Mid-dense | 0.02 |
| 8.3.3a/8.3.6a | 60/40 | Least concern | *Melaleuca leucadendra* and/or *M. fluviatilis* and/or *Casuarina cunninghamiana* +/- *Syncarpia glomulifera* open forest, on creek banks | | Mid-dense | 0.02 |
| 8.3.5 | 100 | Of concern | *Eucalyptus* platyphylla and/or *Lophostemon* *suaveolens* and/or *Corymbia* clarksoniana woodland on alluvial plains | | Sparse | 0.01 |
| 8.3.5/8.3.3a | 95/5 | Of concern | *Eucalyptus* *platyphylla* and/or *Lophostemon* *suaveolens* and/or *Corymbia* clarksoniana woodland on alluvial plains | | Sparse | 0.09 |
| 8.3.6a | 100 | Of concern | *Eucalyptus* *tereticornis* and/or *Corymbia* *intermedia* (or *C. clarksoniana*) and/or *C. tessellaris* +/- *Lophostemon* *suaveolens* open forest on alluvial levees and lower terraces | | Mid-dense | 0.03 |
| 8.3.6a/8.3.3a | 60/40 | Of concern | *Eucalyptus* *tereticornis* and/or *Corymbia* intermedia (or *C. clarksoniana*) and/or *C. tessellaris* +/- *Lophostemon* *suaveolens* open forest on alluvial levees and lower terraces | | Mid-dense | 0.50 |
| non-remnant  (cleared land) | 100 | NA | NA | | NA | 27.06 |

*Non-Eucalypt Site*

**Figure S4. Non-eucalypt site from the 2017 VMRE map colored by vegetation type where blue represents areas dominated by non-eucalypt vegetation.**

**Table S4. Description of non-eucalypt site vegetation communities from the 2017 VMRE map.**

| Regional Ecosystem ID | Percent REID | Vegetation Management Class | Dominant Vegetation Community Description | Structure category | Area (km2) |
| --- | --- | --- | --- | --- | --- |
| 7.11.12a | 100 | Least concern | Simple notophyll vine forest of moist to very wet metamorphic uplands and highlands | Dense | 3.41 |
| 7.11.1a | 100 | Least concern | Simple-complex mesophyll to notophyll vine forest on moderately to poorly drained metamorphics (excluding amphibolites) of moderate fertility of the moist and wet lowlands, foothills and uplands | Dense | 7.74 |
| 7.11.26f | 100 | Of concern | *Allocasuarina littoralis* and *Syncarpia glomulifera* open shrubland to closed scrub or *Bombax ceiba var. leiocarpum* and *Cochlospermum gillivraei* open woodland or *Acacia* spp. shrubland on metamorphic rock pavements | Very sparse | 0.052 |
| 7.12.16a | 100 | Least concern | Simple to complex notophyll vine forest, including small areas of *Araucaria bidwillii*, of cloudy wet and moist uplands and highlands on granites and rhyolites | Dense | 50.90 |
| 7.12.16b | 100 | Least concern | Simple to complex notophyll vine forest, including small areas of *Araucaria bidwillii*, of cloudy wet and moist uplands and highlands on granites and rhyolites | Dense | 2.24 |
| 7.12.1a | 100 | Least concern | Simple-complex mesophyll to notophyll vine forest of moderately to poorly-drained granites and rhyolites of moderate fertility of the moist and wet lowlands, foothills and uplands | Dense | 9.78 |
| 7.12.50 | 100 | Of concern | Simple microphyll vine-fern forest of highlands on granite and rhyolite | Dense | 0.81 |
| 7.12.9 | 100 | Of concern | *Acacia cels*a open forest to closed forest, on granites and rhyolites | Dense | 0.078 |
| 7.3.17 | 100 | Endangered | Complex mesophyll vine forest, on well-drained alluvium of high fertility | Dense | 0.49 |
| 7.3.28a | 100 | Of concern | Rivers and streams including riparian herbfield and shrubland on river and stream bed alluvium and rock within stream beds | Other | 0.03 |
| 7.3.28d | 100 | Of concern | Rivers and streams including riparian herbfield and shrubland on river and stream bed alluvium and rock within stream beds | Other | 0.11 |
| 7.3.36a | 100 | Of concern | Complex mesophyll vine forest or simple notophyll vine forest of high rainfall, cloudy uplands on alluvium | Dense | 0.19 |
| 7.3.49a | 100 | Of concern | Notophyll vine forest on rubble terraces of streams | Dense | 0.02 |
| 7.8.1a | 100 | Least concern | Complex mesophyll to mesophyll vine forest on well-drained basalt lowlands and foothills | Dense | 17.46 |
| 7.8.2a | 100 | Least concern | Complex mesophyll vine forest of high rainfall, cloudy uplands on basalt, including small areas of wind-sheared notophyll vine forest on ridgelines | Dense | 15.62 |
| non-remnant  (cleared land) | 100 | NA | NA | NA | 0.28 |

**Supplementary Winter Imagery Analysis**

*Eucalypt Chlorophyll-a Reflectance Ratio*

*Receiver Operating Characteristic (ROC) Curves*
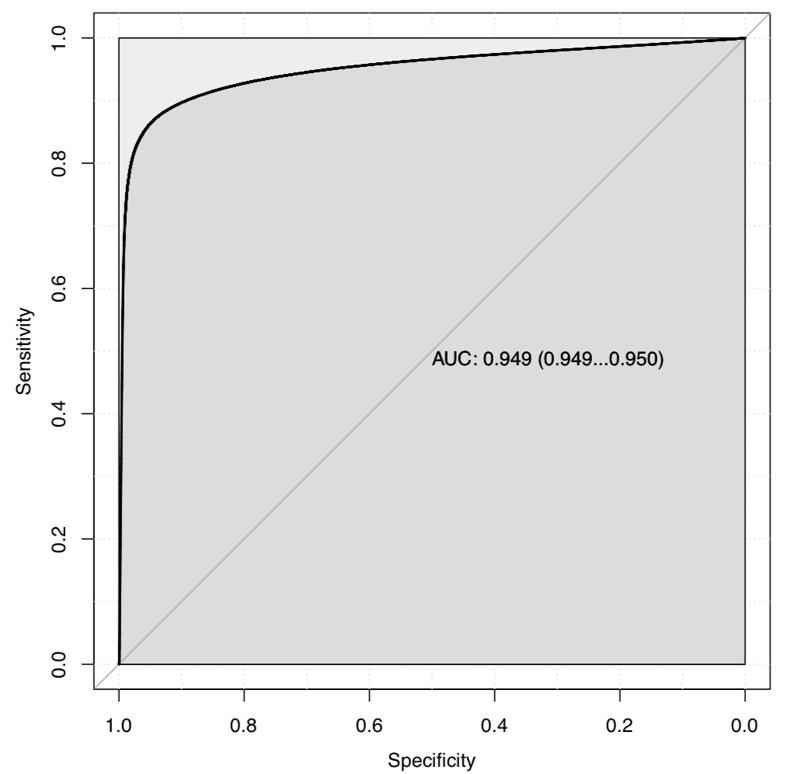


**Figure S5. ROC Curve for ECARR’s ability to detect eucalypt vegetation from Sentinel-2 winter imagery.**

**Table S5. Sentinel-2 ECARR ROC curve specificity and sensitivity for ECARR with ‘best’ method.**

| Specificity | Sensitivity | Accuracy | Negative Predictive Value | Positive Predictive Value |
| --- | --- | --- | --- | --- |
| 0.948 | 0.866 | 0.904 | 0.862 | 0.949 |


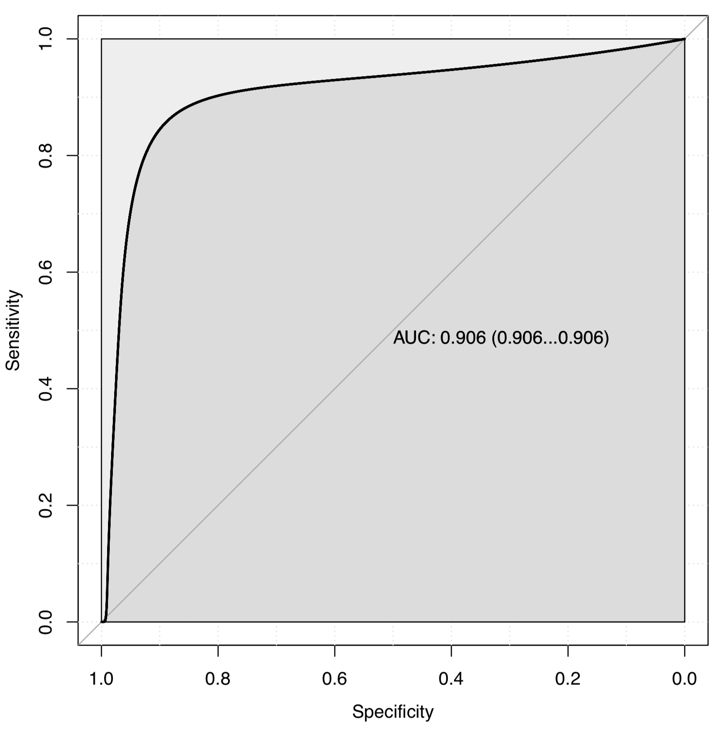


**Figure S6. ROC Curve for ECARR’s ability to detect eucalypt vegetation from Planet winter imagery.**

**Table S6. Planet ECARR ROC curve specificity and sensitivity for ECARR with ‘best’ method.**

| Specificity | Sensitivity | Accuracy | Negative Predictive Value | Positive Predictive Value |
| --- | --- | --- | --- | --- |
| 0.889 | 0.858 | 0.872 | 0.846 | 0.897 |

*
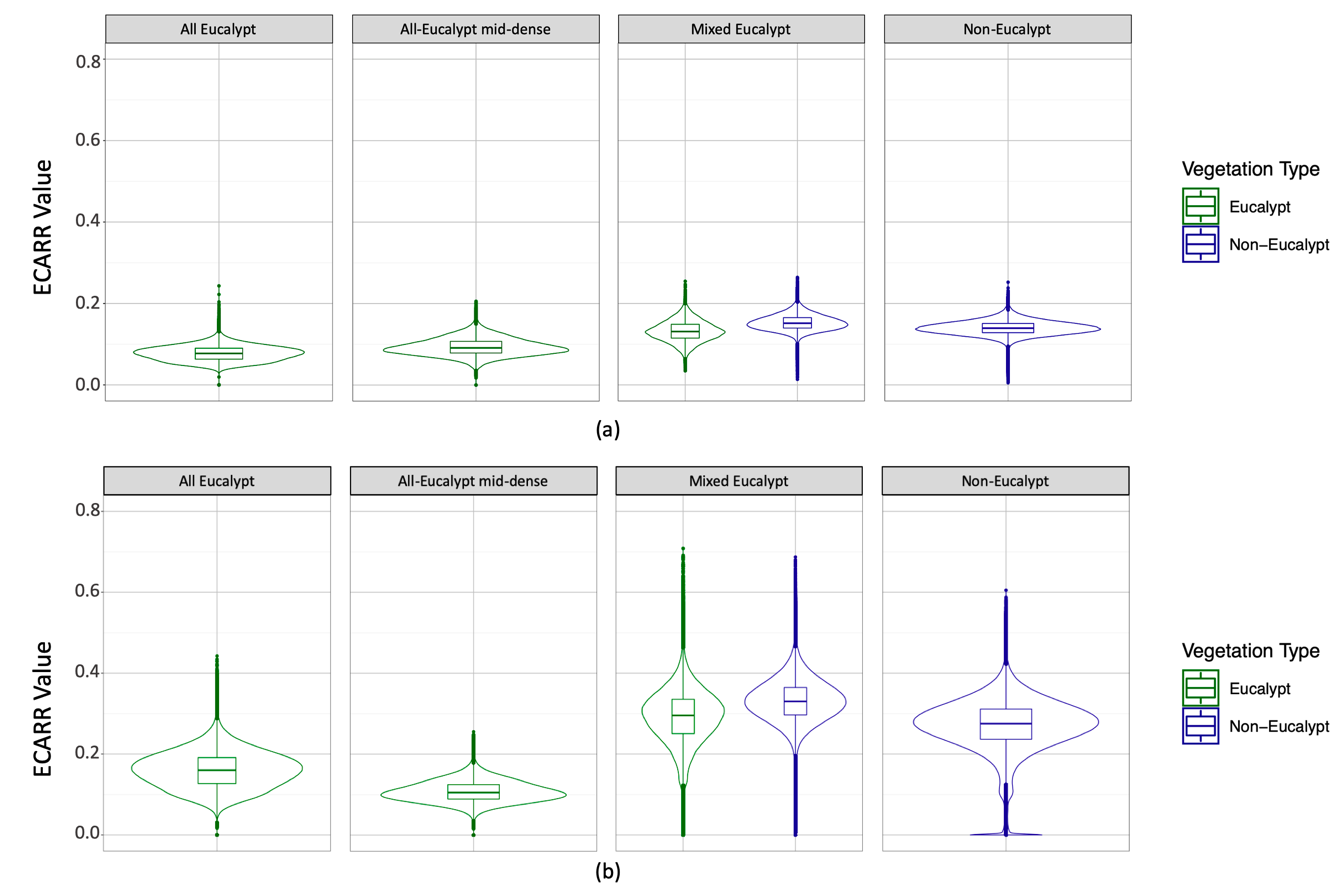
*

**Figure S7. Violin box plots of ECARR values in winter imagery across sites and sensors by vegetation type as characterized in the 2017 VMRE map with unified scale**.


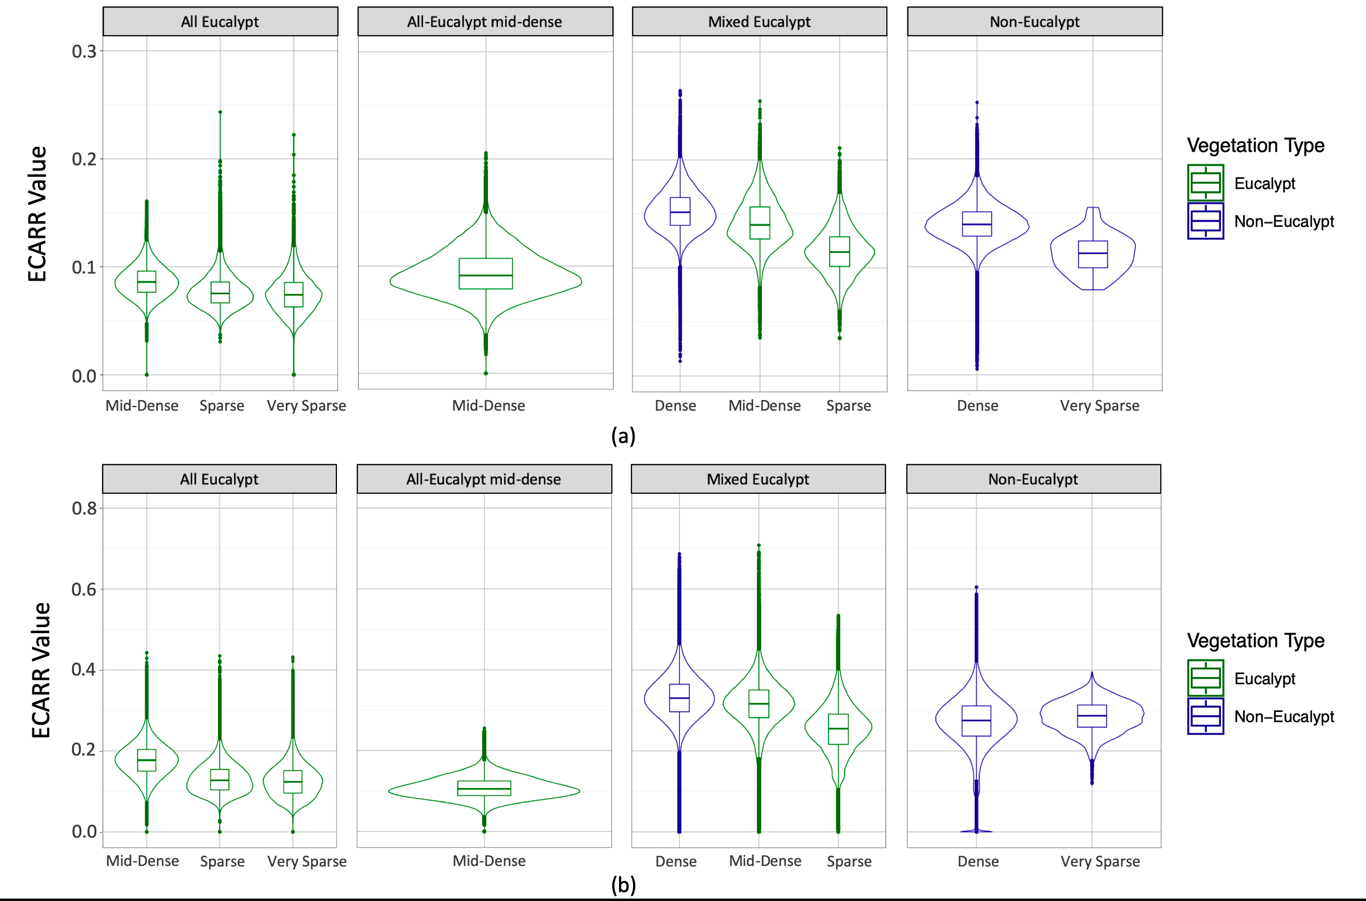


**Figure S8. Violin box plots of ECARR values in winter imagery across sites and sensors by vegetation type and vegetation density as characterized in the 2017 VMRE map**.

**Figure S9. Sentinel-2 winter imagery ECARR value distribution across all sites colored by density structure.**

**Table S7. ANOVA Table (type II tests) for effect of vegetation type on ECARR for Sentinel-2 winter imagery.**

| Effect | Degrees of Freedom (n) | Degrees of Freedom (d) | F | p | p<.05 | Generalized Effect Size |
| --- | --- | --- | --- | --- | --- | --- |
| Veg Type | 1 | 909000 | 1347476 | 0 | * | 0.597 |

**Table S8. ANOVA Table (type II tests) for effect of density structure on ECARR for Sentinel-2 winter imagery.**

| Effect | Degrees of Freedom (n) | Degrees of Freedom (d) | F | p | p<.05 | Generalized Effect Size |
| --- | --- | --- | --- | --- | --- | --- |
| Density | 3 | 908998 | 502989.6 | 0 | * | 0.624 |

**Figure S10. Planet winter imagery ECARR value distribution across all sites colored by density structure.**

**Table S9. ANOVA Table (type II tests) for effect of vegetation type on ECARR for Planet winter imagery.**

| Effect | Degrees of Freedom (n) | Degrees of Freedom (d) | F | p | p<.05 | Generalized Effect Size |
| --- | --- | --- | --- | --- | --- | --- |
| Veg Type | 1 | 40218345 | 38447691 | 0 | * | 0.489 |

**Table S10. ANOVA Table (type II tests) for effect of density structure on ECARR for Planet winter imagery.**

| Effect | Degrees of Freedom (n) | Degrees of Freedom (d) | F | p | p<.05 | Generalized Effect Size |
| --- | --- | --- | --- | --- | --- | --- |
| Density | 3 | 40218343 | 12955457 | 0 | * | 0.491 |

**Figure S11. Sentinel-2 winter imagery ECARR value distribution across all sites colored by site.**

**Figure S12. Planet winter imagery ECARR value distribution across all sites colored by site.**

*Location of ‘High’ ECARR Values in Mixed Eucalypt Site*
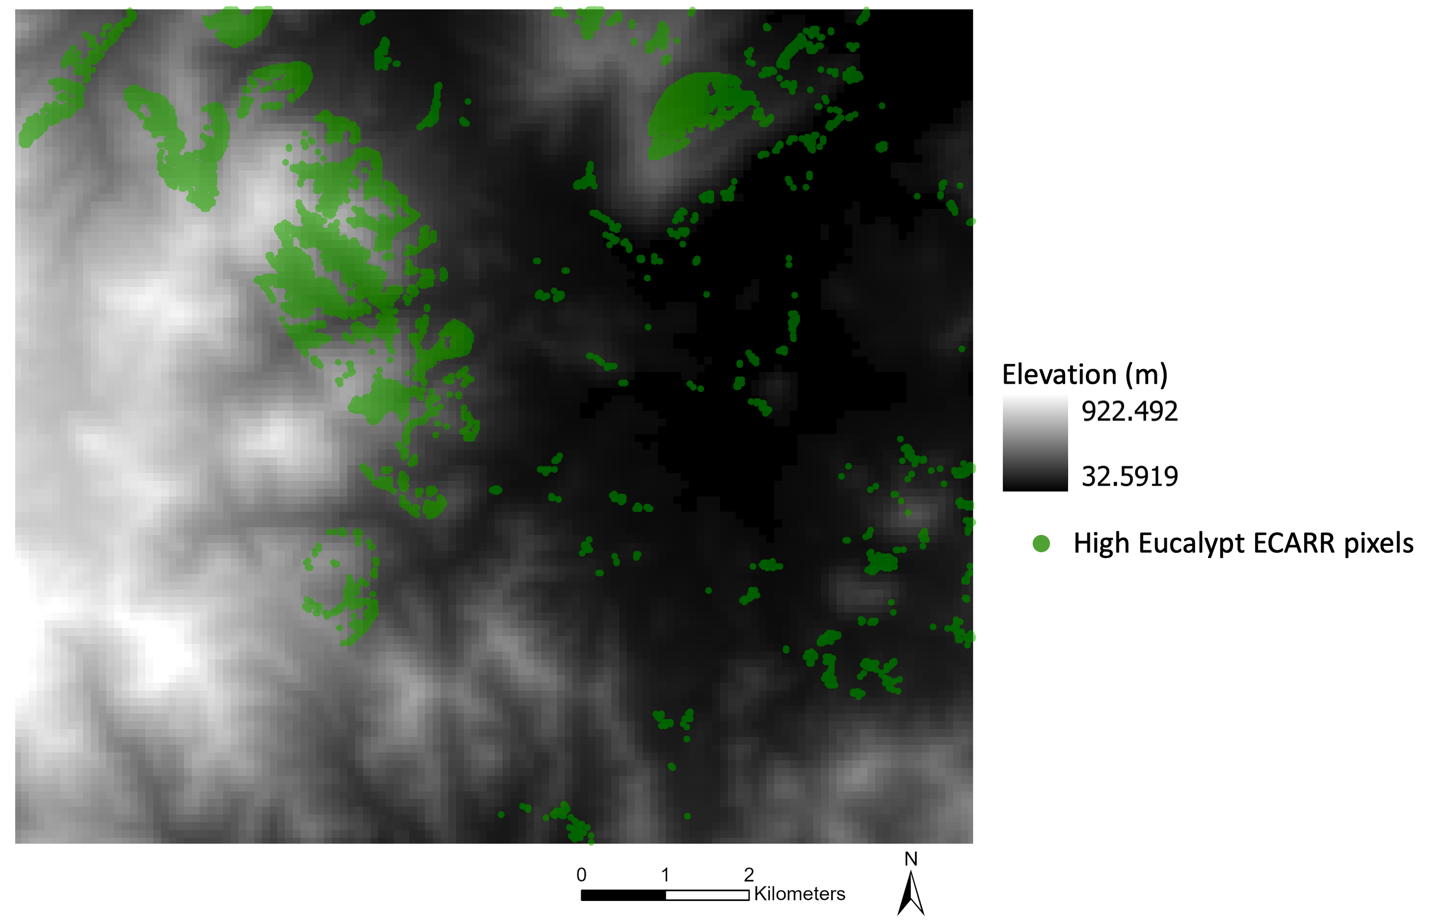


**Figure S13. Mixed Eucalypt Site with Digital Elevation Model**[1] **colorized with white as high elevation and black as low elevation and high ECARR values in eucalypt vegetation communities in green from winter imagery**.


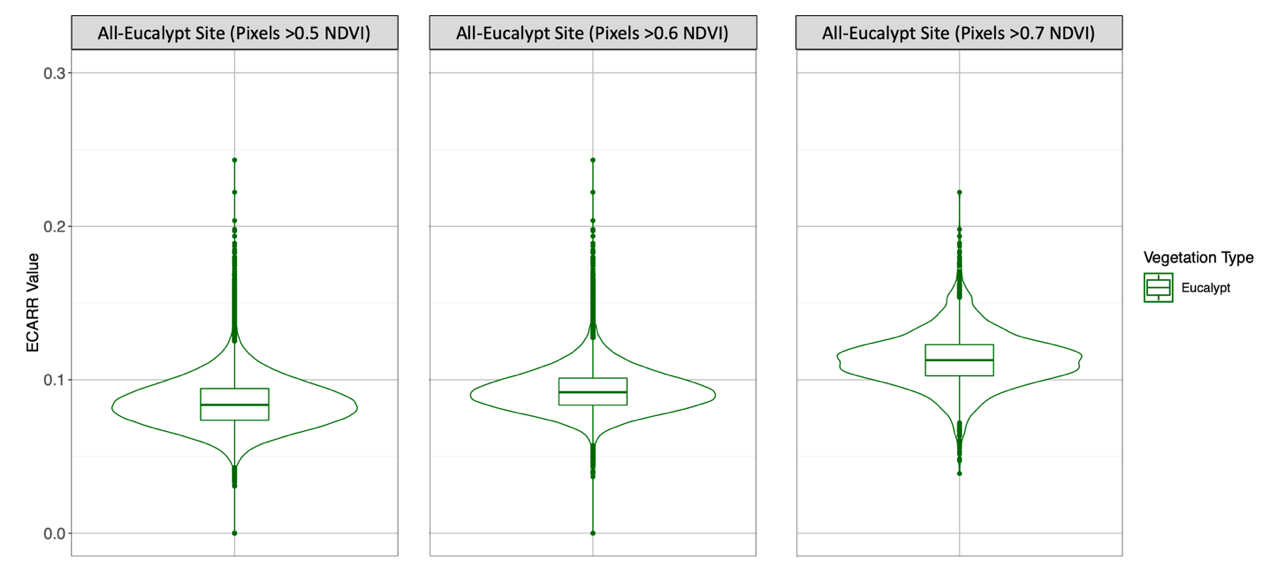


**Figure S14. Violin box plots of Sentinel-2 winter imagery ECARR values in the large all-eucalypt site selected by high NDVI thresholds of that pixel**.

*Eucalypt Chlorophyll-b Reflectance Ratio*

*Receiver Operating Characteristic Curves*
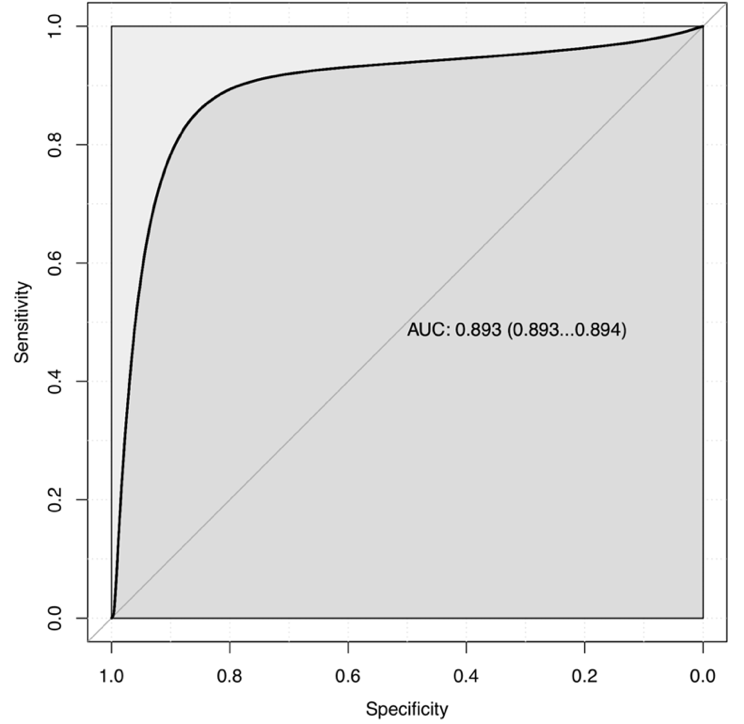


**Figure S15. ROC Curve for ECBRR’s ability to detect eucalypt vegetation from Sentinel-2 winter imagery.**

**Table S11. Sentinel 2 ECBRR ROC curve specificity and sensitivity for ECBRR on winter imagery with ‘best’ method.**

| Specificity | Sensitivity | Accuracy | Negative Predictive Value | Positive Predictive Value |
| --- | --- | --- | --- | --- |
| 0.853 | 0.857 | 0.855 | 0.841 | 0.868 |


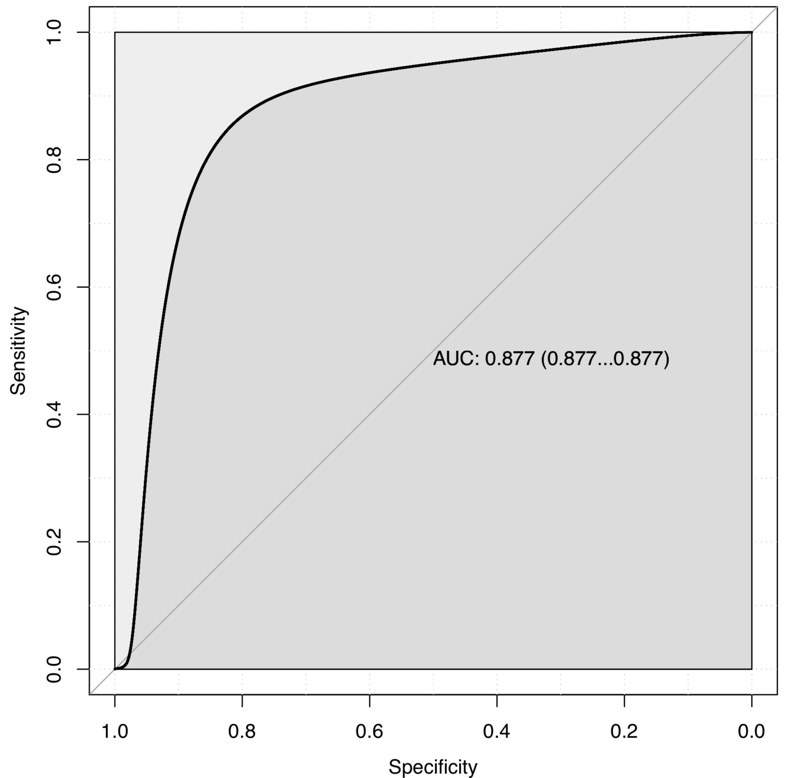


**Figure S16. ROC Curve for ECBRR’s ability to detect eucalypt vegetation from Planet imagery.**

**Table S12. Planet ECBRR ROC curve specificity and sensitivity for ECBRR on winter imagery with ‘best’ method.**

| Specificity | Sensitivity | Accuracy | Negative Predictive Value | Positive Predictive Value |
| --- | --- | --- | --- | --- |
| 0.817 | 0.853 | 0.836 | 0.831 | 0.841 |


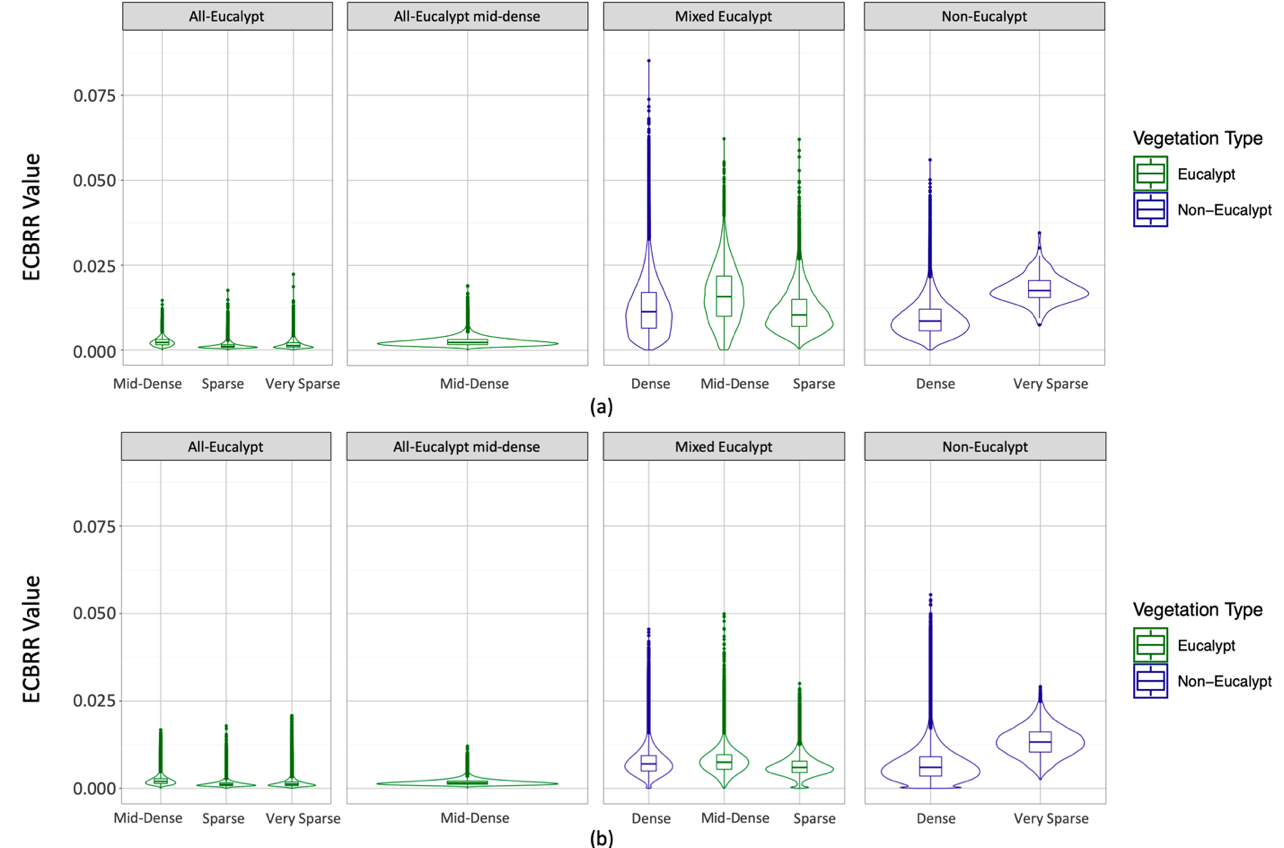


**Figure S17. Violin Box plots of winter imagery ECBRR values across sites and sensors by vegetation type and vegetation density as characterized in 2017 VMRE map.**

**Figure S18. Sentinel-2 winter imagery ECBRR values across all sites colored by density structure.**

**Table S13. ANOVA Table (type II tests) for effect of vegetation type on ECBRR for Sentinel-2 winter imagery.**

| Effect | Degrees of Freedom (n) | Degrees of Freedom (d) | F | p | p<.05 | Generalized Effect Size |
| --- | --- | --- | --- | --- | --- | --- |
| Veg Type | 1 | 908906 | 392769.6 | 0 | * | 0.302 |

**Table S14. ANOVA Table (type II tests) for effect of density structure on ECBRR for Sentinel-2 winter imagery.**

| Effect | Degrees of Freedom (n) | Degrees of Freedom (d) | F | p | p<.05 | Generalized Effect Size |
| --- | --- | --- | --- | --- | --- | --- |
| Density | 3 | 908904 | 131596.7 | 0 | * | 0.303 |

**Figure S19. Planet winter imagery ECBRR values across all sites colored by density structure.**

**Table S15. ANOVA Table (type II tests) for effect of vegetation type on ECBRR for Planet winter imagery.**

| Effect | Degrees of Freedom (n) | Degrees of Freedom (d) | F | p | p<.05 | Generalized Effect Size |
| --- | --- | --- | --- | --- | --- | --- |
| Veg Type | 1 | 40218340 | 22282946 | 0 | * | 0.357 |

**Table S16. ANOVA Table (type II tests) for effect of density structure on ECBRR for Planet winter imagery.**

| Effect | Degrees of Freedom (n) | Degrees of Freedom (d) | F | p | p<.05 | Generalized Effect Size |
| --- | --- | --- | --- | --- | --- | --- |
| Density | 3 | 40218338 | 7438729 | 0 | * | 0.357 |

**Figure S20. Sentinel-2 winter imagery ECBRR values across all sites colored by site.**

**Figure S21. Planet winter imagery ECBRR values across all sites colored by site.**

*Location of ‘High’ ECBRR Values in Mixed Eucalypt Site*
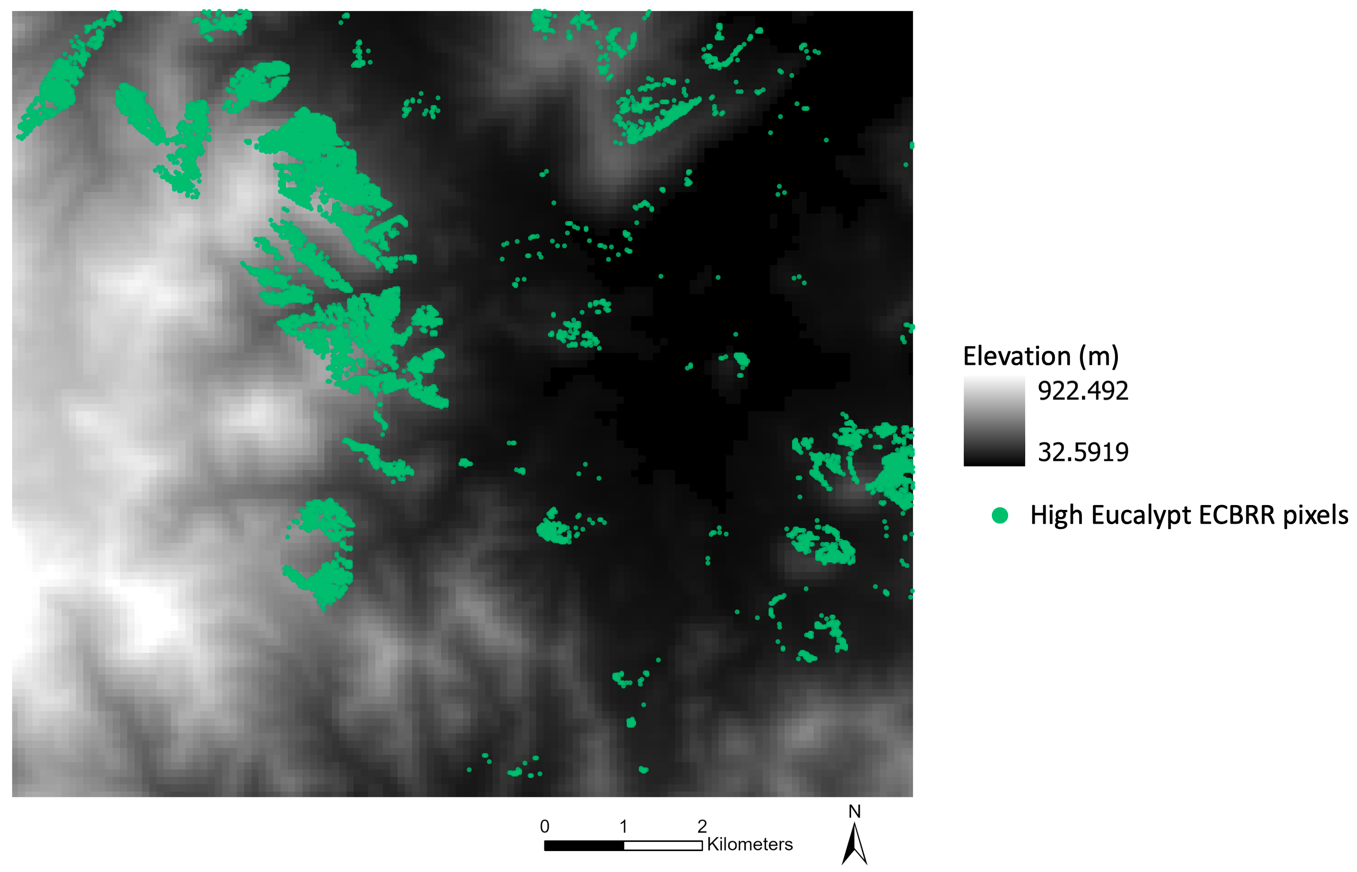


**Figure S22. Mixed Eucalypt Site with Queensland Digital Elevation Model** [1] **colorized with white as high elevation and black as low elevation and high ECBRR values in eucalypt vegetation communities in green from winter imagery.**

*Normalized Difference Vegetation Index*


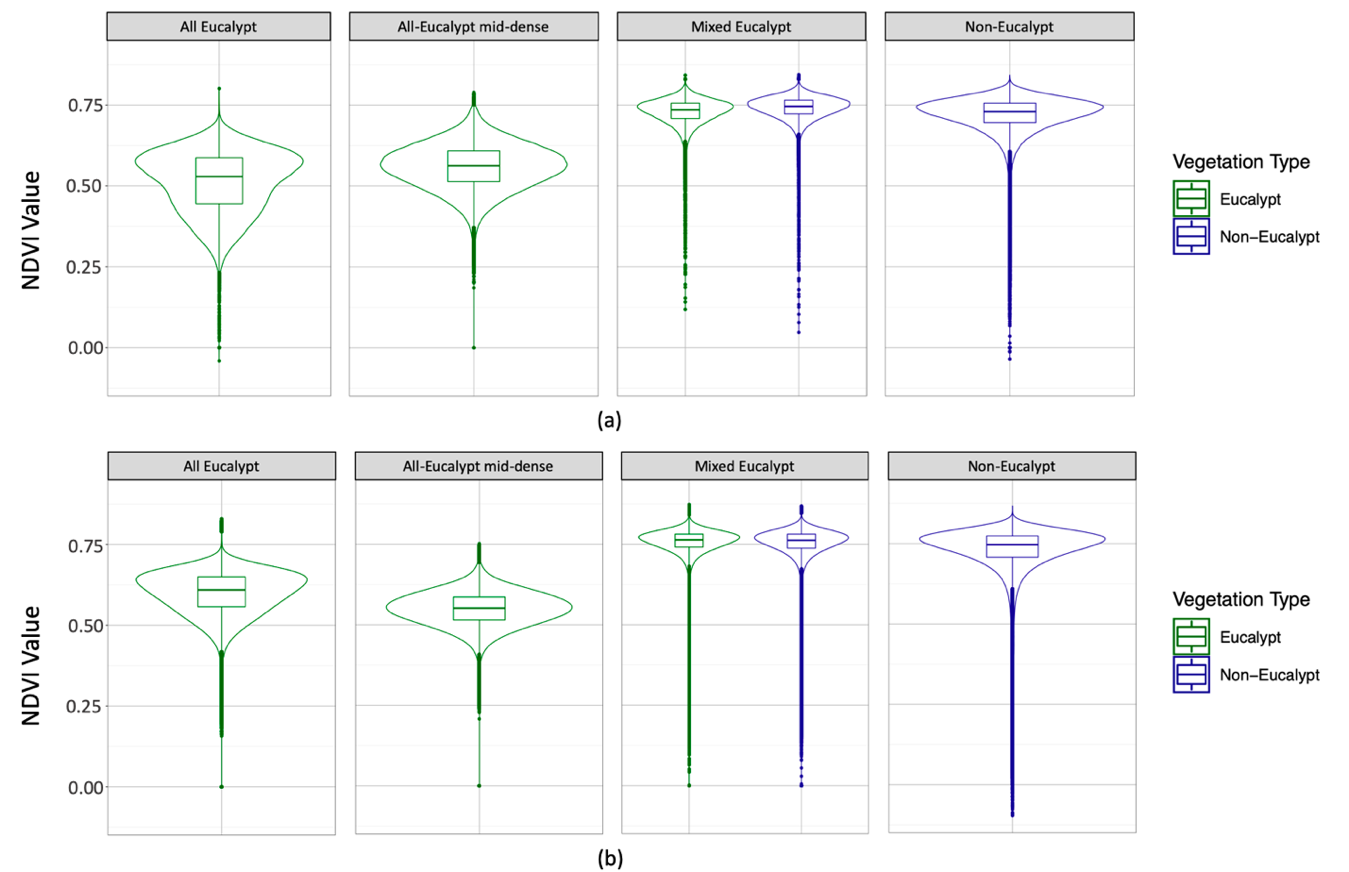


**Figure S23. Violin Box plots of winter imagery NDVI values across sites and sensors by vegetation type.**


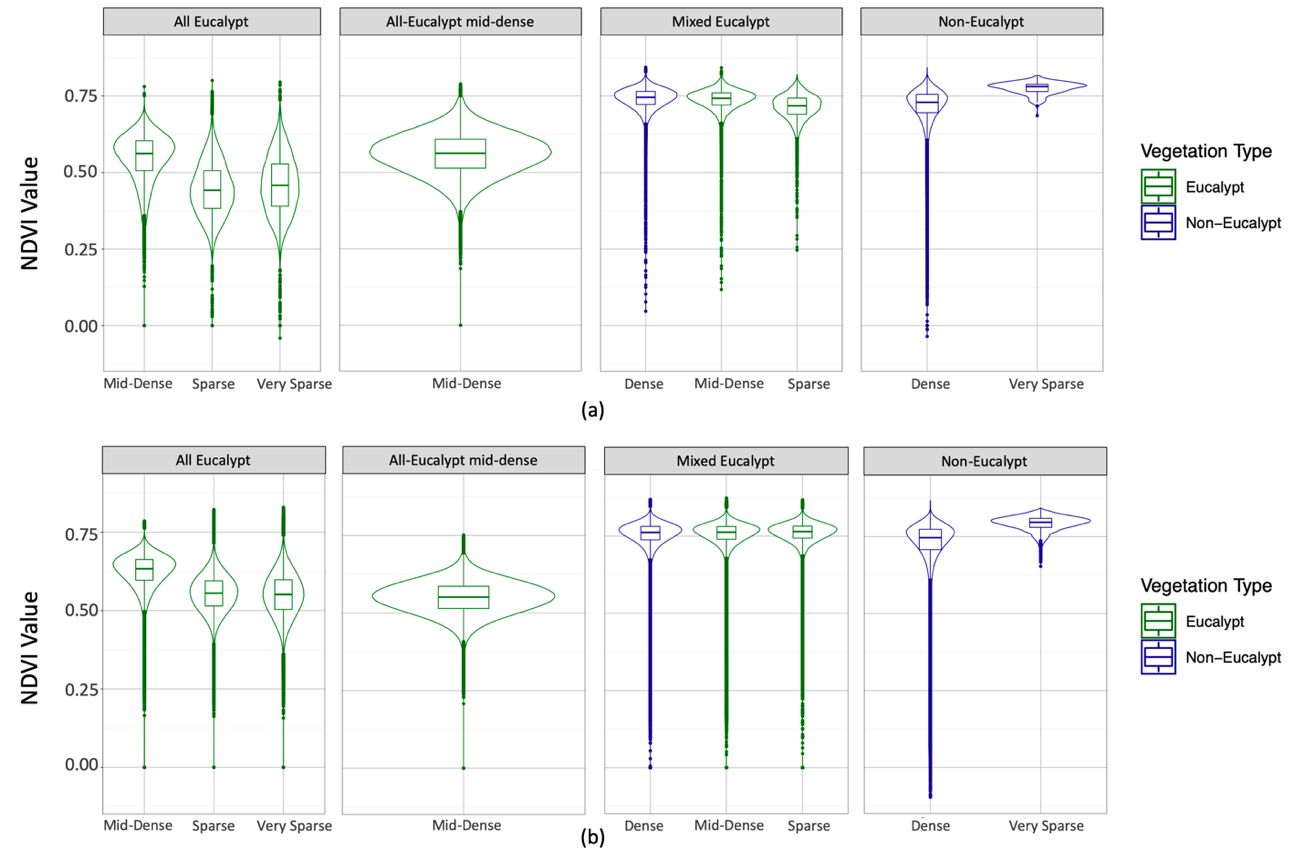


**Figure S24. Violin Box plots of winter imagery NDVI values across sites and sensors by vegetation type and vegetation density as characterized in 2017 VMRE map.**

**Late Spring/Summer Imagery Analysis Results**
*Eucalypt Chlorophyll-a Reflectance Ratio*

**Table S17. Eucalypt Chlorophyll-*a* Reflectance Ratio value ranges and mean of late spring/summer imagery for the three large sites and both satellite sensors.**

| **Satellite** | **ECARR**  **Values** | **Large All- Eucalypt Site** | **Mixed Eucalypt Site** | **Non-Eucalypt Site** |
| --- | --- | --- | --- | --- |
| Sentinel-2 | Maximum | 0.181 | 0.126 | 0.162 |
| Minimum | 0.000 | 0.000 | 0.000 |
| Mean | 0.066 | 0.072 | 0.094 |
| Planet | Maximum | 0.228 | 0.464 | 0.376 |
| Minimum | 0.000 | 0.000 | 0.000 |
| Mean | 0.070 | 0.222 | 0.212 |


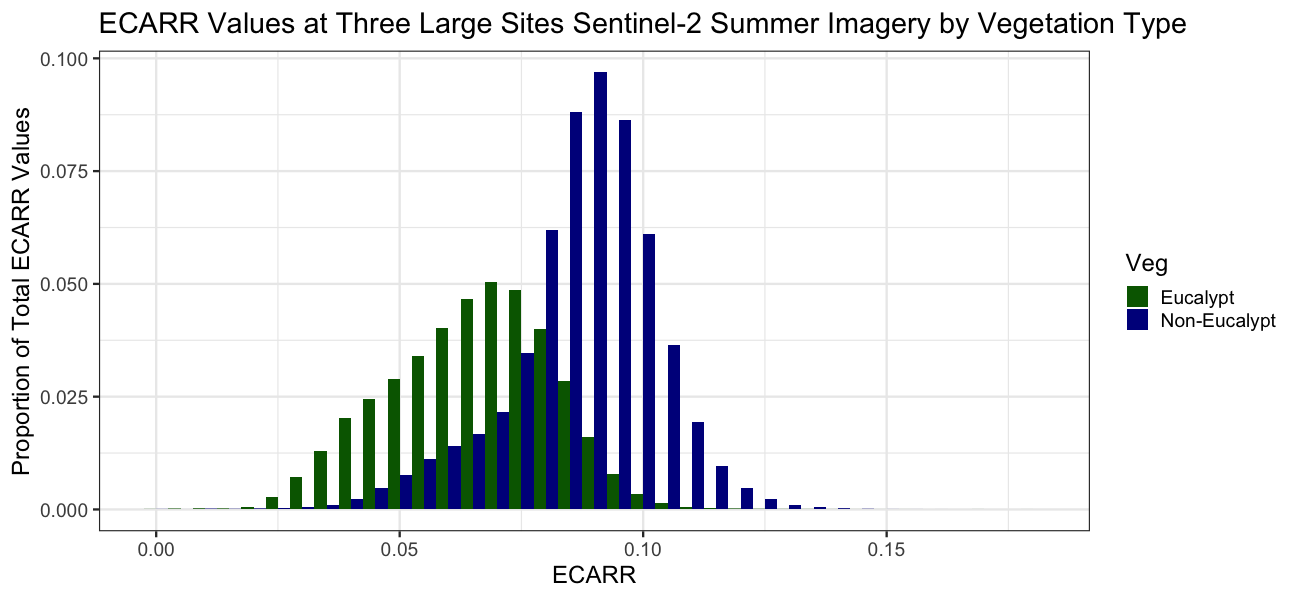


**Figure S25. Sentinel-2 late spring/summer imagery ECARR values across three large sites colored by vegetation type.**


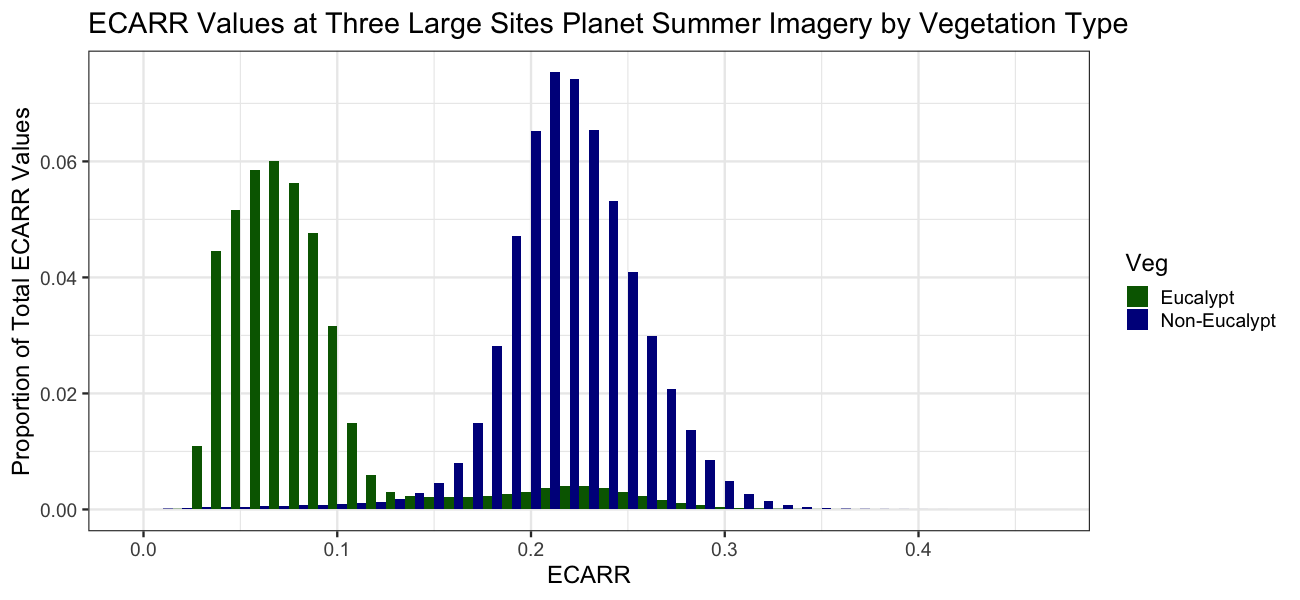


**Figure S26. Planet late spring/summery imagery ECARR values across three large sites colored by vegetation type.**


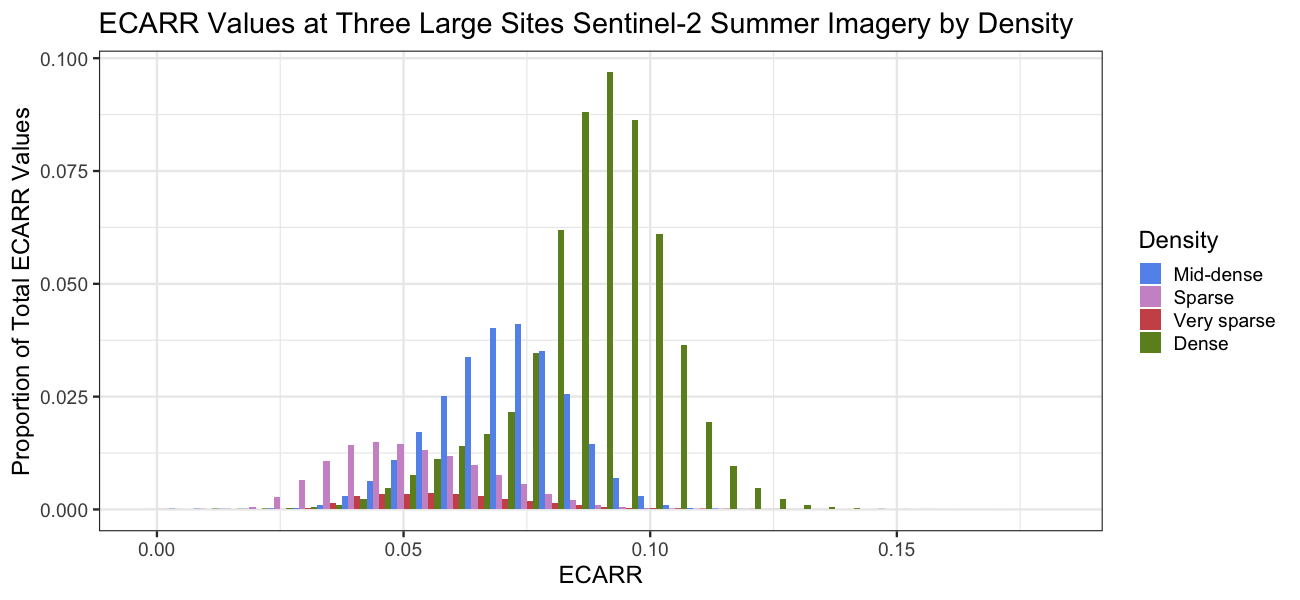


**Figure S27. Sentinel-2 late spring/summer imagery ECARR values across three large sites colored by density.**

**Table S18. ANOVA Table (type II tests) for vegetation type on ECARR for Sentinel-2 late spring/summer imagery.**

| Effect | Degrees of Freedom (n) | Degrees of Freedom (d) | F | p | p<.05 | Generalized Effect Size |
| --- | --- | --- | --- | --- | --- | --- |
| Veg Type | 1 | 732746 | 363418 | 0 | * | 0.332 |

**Table S19. ANOVA Table (type II tests) for effect of density structure on ECARR for Sentinel-2 late spring/summer imagery.**

| Effect | Degrees of Freedom (n) | Degrees of Freedom (d) | F | p | p<.05 | Generalized Effect Size |
| --- | --- | --- | --- | --- | --- | --- |
| Density | 3 | 732744 | 171830 | 0 | * | 0.413 |


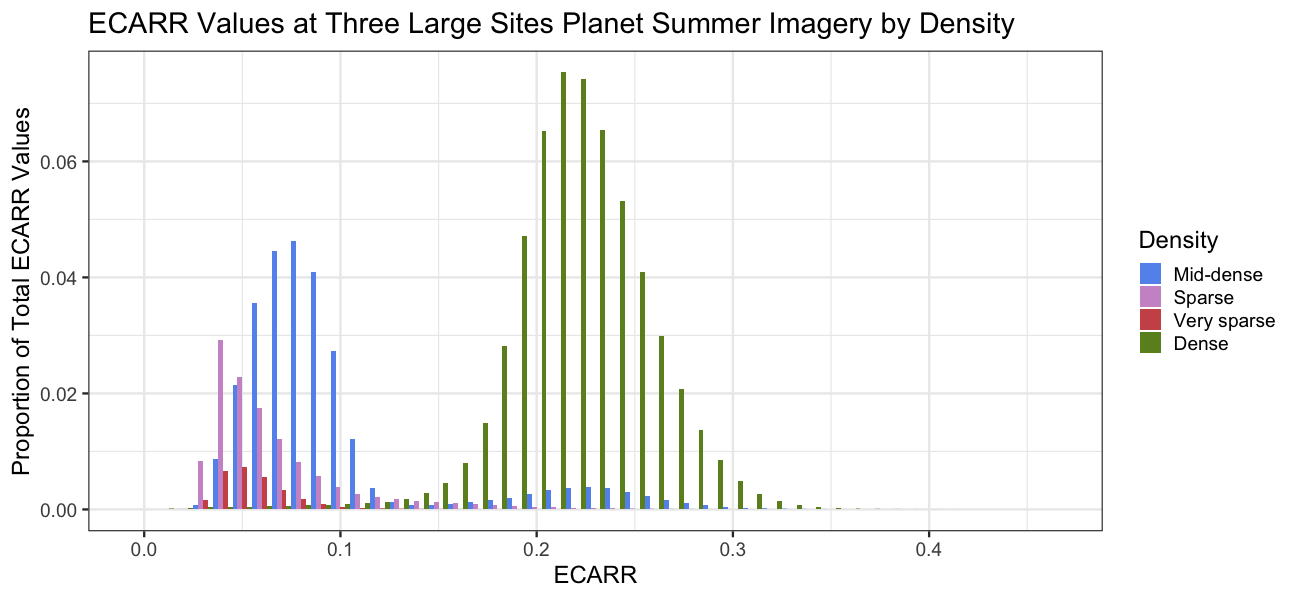


**Figure S28. Planet late spring/summer imagery ECARR values across three large sites colored by density.**

**Table S20. ANOVA Table (type II tests) for vegetation type on ECARR for Planet late spring/summer imagery.**

| Effect | Degrees of Freedom (n) | Degrees of Freedom (d) | F | p | p<.05 | Generalized Effect Size |
| --- | --- | --- | --- | --- | --- | --- |
| Veg | 1 | 31194010 | 78507094 | 0 | * | 0.716 |

**Table S21. ANOVA Table (type II tests) for effect of density structure on ECARR for Planet late spring/summer imagery.**

| Effect | Degrees of Freedom (n) | Degrees of Freedom (d) | F | p | p<.05 | Generalized Effect Size |
| --- | --- | --- | --- | --- | --- | --- |
| Density | 3 | 31194008 | 28234456 | 0 | * | 0.731 |

*Eucalypt Chlorophyll-b Reflectance Ratio*

**Table S22. Eucalypt Chlorophyll-*b* Reflectance Ratio value ranges and mean of late spring/summer imagery for the three large sites and both satellite sensors.**

| **Satellite** | **ECBRR**  **Value** | **Large All- Eucalypt Site** | **Mixed Eucalypt Site** | **Non-Eucalypt Site** |
| --- | --- | --- | --- | --- |
| Sentinel-2 | Maximum | 0.024 | 0.015 | 0.034 |
| Minimum | 0.000 | 0.000 | 0.000 |
| Mean | 0.003 | 0.004 | 0.011 |
| Planet | Maximum | 0.010 | 0.029 | 0.023 |
| Minimum | 0.000 | 0.000 | 0.000 |
| Mean | 0.001 | 0.006 | 0.006 |


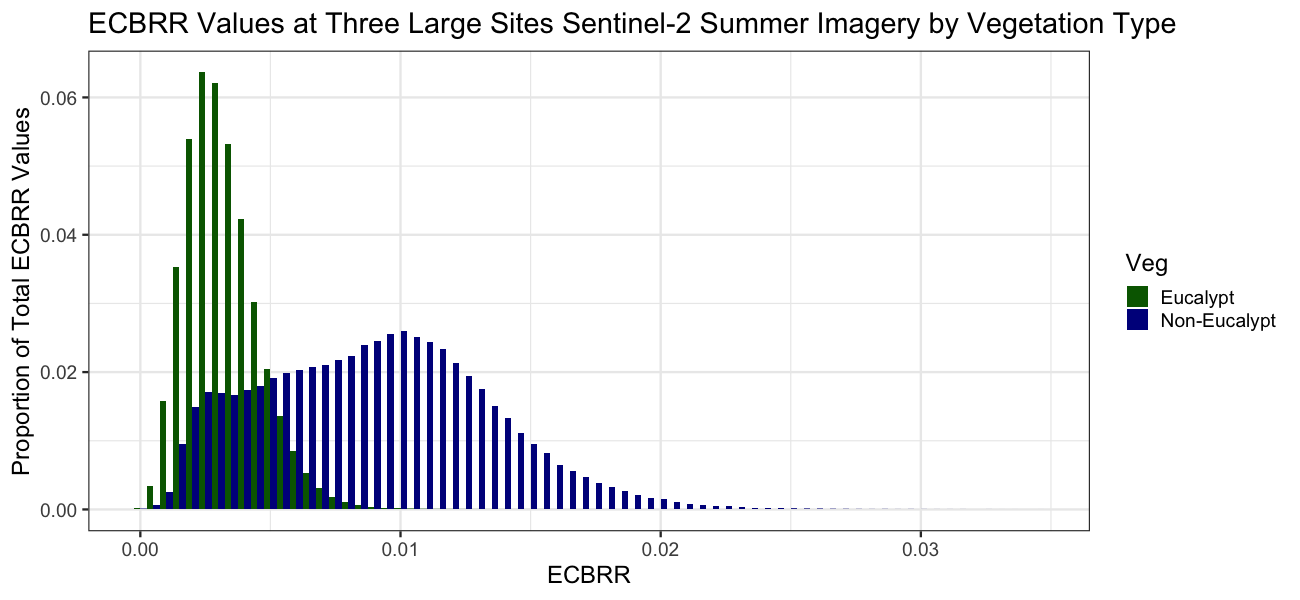


**Figure S29. Sentinel-2 late spring/summer imagery ECBRR values across three large sites colored by vegetation type.**


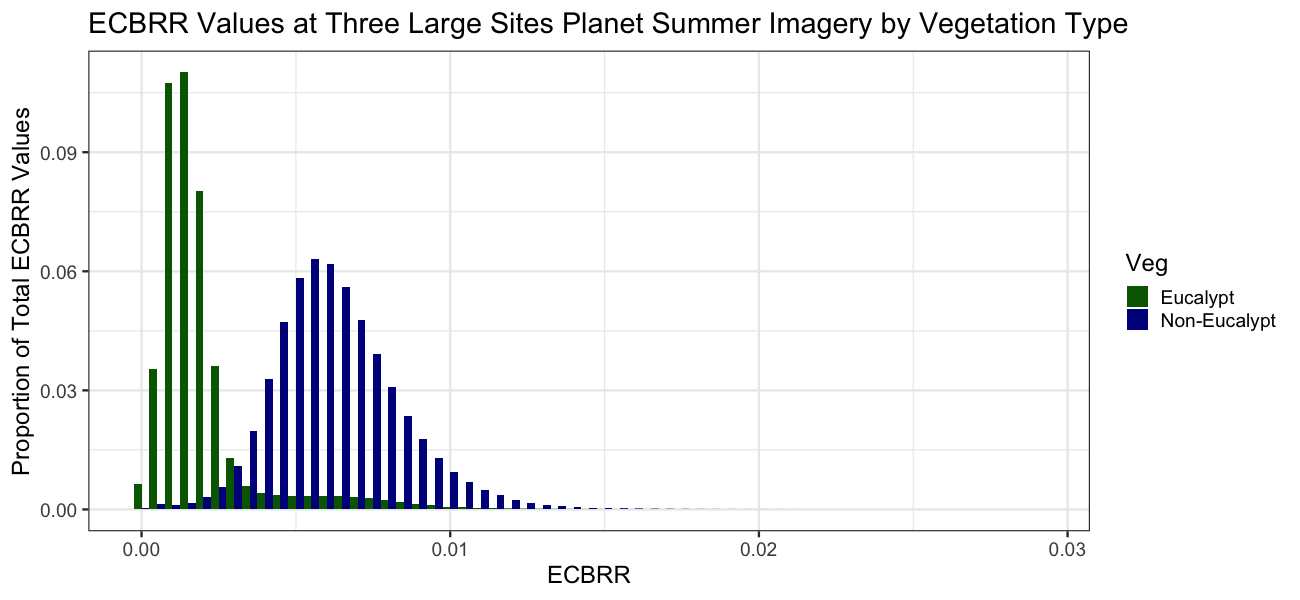


**Figure S30. Planet late spring/summer imagery ECBRR values across three large sites colored by vegetation type.**


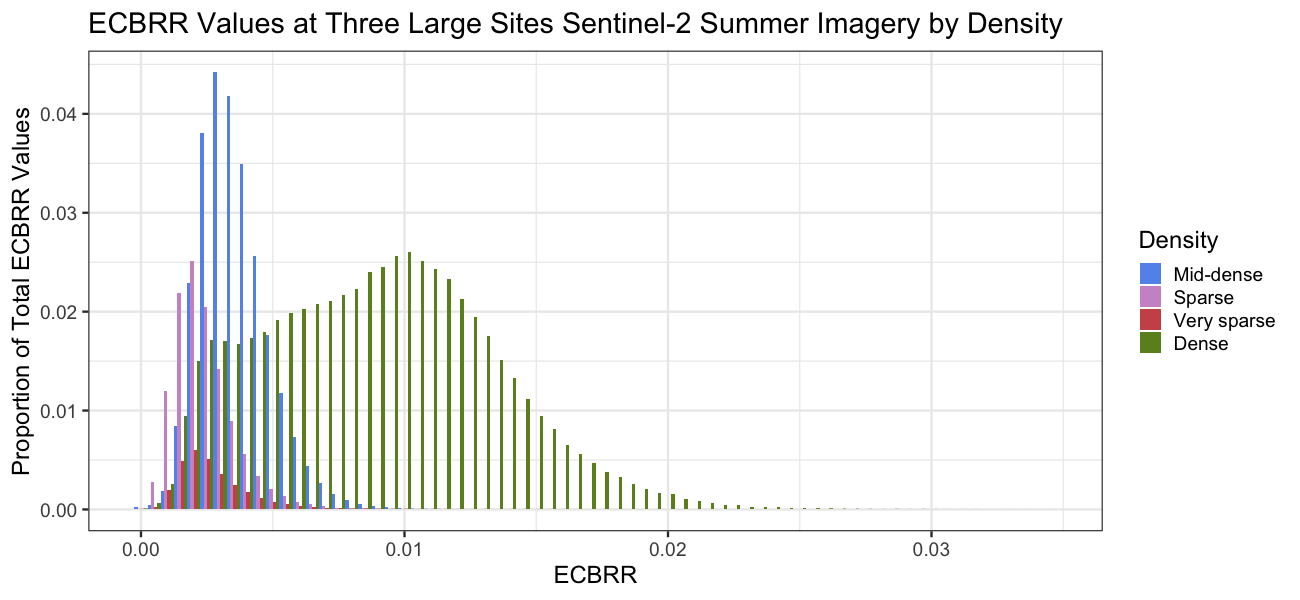

**Figure S31. Sentinel-2 late spring/summer imagery ECBRR values across three large sites colored by density.**

**Table S23. ANOVA Table (type II tests) for effect of density structure on ECBRR for Sentinel-2 late spring/summer imagery.**

| Effect | Degrees of Freedom (n) | Degrees of Freedom (d) | F | p | p<.05 | Generalized Effect Size |
| --- | --- | --- | --- | --- | --- | --- |
| Veg Type | 1 | 732704 | 496814 | 0 | * | 0.404 |

**Table S24. ANOVA Table (type II tests) for effect of density structure on ECBRR for Sentinel-2 late spring/summer imagery.**

| Effect | Degrees of Freedom (n) | Degrees of Freedom (d) | F | p | p<.05 | Generalized Effect Size |
| --- | --- | --- | --- | --- | --- | --- |
| Density | 3 | 732702 | 169557 | 0 | * | 0.410 |


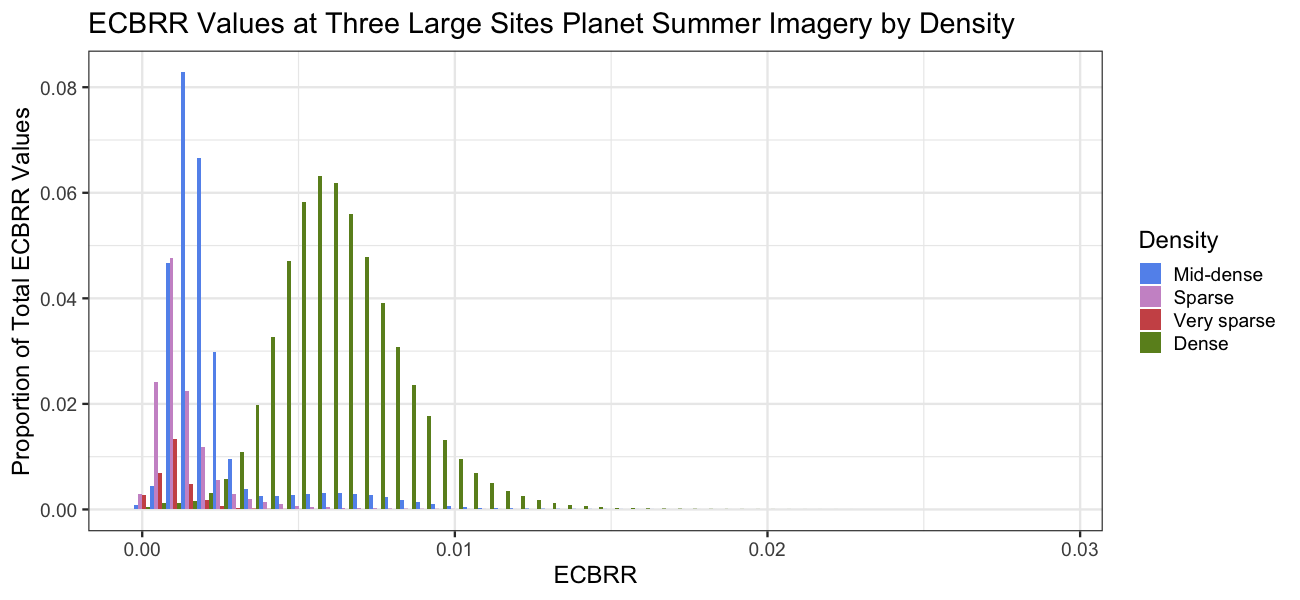


**Figure S32. Planet late spring/summer imagery ECBRR values across three large sites colored by density.**

**Table S25. ANOVA Table (type II tests) for effect of density structure on ECBRR for Planet late spring/summer imagery.**

| Effect | Degrees of Freedom (n) | Degrees of Freedom (d) | F | p | p<.05 | Generalized Effect Size |
| --- | --- | --- | --- | --- | --- | --- |
| Veg Type | 1 | 31194010 | 39408015 | 0 | * | 0.558 |

**Table S26. ANOVA Table (type II tests) for effect of density structure on ECBRR for Planet late spring/summer imagery.**

| Effect | Degrees of Freedom (n) | Degrees of Freedom (d) | F | p | p<.05 | Generalized Effect Size |
| --- | --- | --- | --- | --- | --- | --- |
| Density | 3 | 31194008 | 13720996 | 0 | * | 0.569 |

**Table S27. Normalized Difference Vegetation Index value ranges and mean of late spring/summer imagery for the three large sites and both satellite sensors.**

| **Satellite** | **NDVI**  **Value** | **Large All- Eucalypt Site** | **Mixed Eucalypt Site** | **Non-Eucalypt Site** |
| --- | --- | --- | --- | --- |
| Sentinel-2 | Maximum | 0.810 | 0.770 | 0.853 |
| Minimum | 0.190 | 0.106 | -0.062 |
| Mean | 0.534 | 0.599 | 0.720 |
| Planet | Maximum | 0.760 | 0.836 | 0.856 |
| Minimum | 0.045 | 0.129 | -0.768 |
| Mean | 0.485 | 0.721 | 0.728 |

**REFERENCES:**

1. Department of Natural Resources, Mines, and E. Digital elevation model - 3 second - Queensland 2020.
